# Supplementary material
Source: publisher figshare collection journal article supplement (https://gsajournals.figshare.com/ndownloader/files/17284196)
Supplement: Supplementary file 1 [file 17284196]

## Sheet: Table S8 GO analysis of autosom
Supplemental Material, Table S8. GO analysis of autosomal downregulated genes in Smchd1-null mouse NPCs
Category	Term	Count	%	PValue	Genes	List Total	Pop Hits	Pop Total	Fold Enrichment	Bonferroni	Benjamini	FDR
GOTERM_BP_DIRECT	GO:0048661~positive regulation of smooth muscle cell proliferation	5	6.84932	0.00012569	ENSMUSG00000059588, ENSMUSG00000024486, ENSMUSG00000028341, ENSMUSG00000031778, ENSMUSG00000000489	59	80	18082	19.1547	0.0755543	0.0755543	0.186509
GOTERM_BP_DIRECT	GO:2001240~negative regulation of extrinsic apoptotic signaling pathway in absence of ligand	3	4.10959	0.00500876	ENSMUSG00000017897, ENSMUSG00000031778, ENSMUSG00000025422	59	33	18082	27.8613	0.956645	0.791782	7.18629
GOTERM_BP_DIRECT	GO:0000122~negative regulation of transcription from RNA polymerase II promoter	8	10.9589	0.00847771	ENSMUSG00000022091, ENSMUSG00000024561, ENSMUSG00000037638, ENSMUSG00000042589, ENSMUSG00000044080, ENSMUSG00000000782, ENSMUSG00000028341, ENSMUSG00000022658	59	729	18082	3.36323	0.995113	0.830299	11.8778
GOTERM_BP_DIRECT	GO:0043524~negative regulation of neuron apoptotic process	4	5.47945	0.0147055	ENSMUSG00000028341, ENSMUSG00000002985, ENSMUSG00000067629, ENSMUSG00000025422	59	160	18082	7.66186	0.999905	0.901214	19.7501
GOTERM_BP_DIRECT	GO:0097114~NMDA glutamate receptor clustering	2	2.73973	0.0190946	ENSMUSG00000024109, ENSMUSG00000002985	59	6	18082	102.158	0.999994	0.910176	24.8986
GOTERM_BP_DIRECT	GO:0007155~cell adhesion	6	8.21918	0.0194362	ENSMUSG00000022091, ENSMUSG00000016028, ENSMUSG00000028364, ENSMUSG00000028047, ENSMUSG00000031778, ENSMUSG00000024109	59	485	18082	3.79144	0.999995	0.87056	25.286
GOTERM_BP_DIRECT	GO:0010544~negative regulation of platelet activation	2	2.73973	0.022242	ENSMUSG00000002985, ENSMUSG00000000489	59	7	18082	87.5642	0.999999	0.865785	28.399
GOTERM_BP_DIRECT	GO:0060326~cell chemotaxis	3	4.10959	0.0259854	ENSMUSG00000024486, ENSMUSG00000031778, ENSMUSG00000000489	59	78	18082	11.7875	1	0.872157	32.3641
GOTERM_BP_DIRECT	GO:0030335~positive regulation of cell migration	4	5.47945	0.0273898	ENSMUSG00000052353, ENSMUSG00000024486, ENSMUSG00000031778, ENSMUSG00000000489	59	203	18082	6.03891	1	0.854649	33.7981
GOTERM_BP_DIRECT	GO:0042060~wound healing	3	4.10959	0.0366151	ENSMUSG00000016028, ENSMUSG00000028364, ENSMUSG00000031778	59	94	18082	9.7811	1	0.90284	42.5356
GOTERM_BP_DIRECT	GO:0060259~regulation of feeding behavior	2	2.73973	0.0439977	ENSMUSG00000044288, ENSMUSG00000050164	59	14	18082	43.7821	1	0.922426	48.7397
GOTERM_BP_DIRECT	GO:0030336~negative regulation of cell migration	3	4.10959	0.0454997	ENSMUSG00000031778, ENSMUSG00000036856, ENSMUSG00000000489	59	106	18082	8.67381	1	0.911556	49.9229
GOTERM_BP_DIRECT	GO:0007165~signal transduction	9	12.3288	0.0459768	ENSMUSG00000059588, ENSMUSG00000016028, ENSMUSG00000044288, ENSMUSG00000037999, ENSMUSG00000050164, ENSMUSG00000036856, ENSMUSG00000024109, ENSMUSG00000074939, ENSMUSG00000067629	59	1255	18082	2.19783	1	0.895946	50.2933
GOTERM_BP_DIRECT	GO:0031103~axon regeneration	2	2.73973	0.0501257	ENSMUSG00000050896, ENSMUSG00000002985	59	16	18082	38.3093	1	0.899318	53.4089
GOTERM_BP_DIRECT	GO:0043547~positive regulation of GTPase activity	3	4.10959	0.0798606	ENSMUSG00000031778, ENSMUSG00000036856, ENSMUSG00000026527	59	146	18082	6.29742	1	0.968818	70.9488
GOTERM_BP_DIRECT	GO:0032967~positive regulation of collagen biosynthetic process	2	2.73973	0.0801915	ENSMUSG00000036856, ENSMUSG00000000489	59	26	18082	23.575	1	0.961812	71.1036
GOTERM_BP_DIRECT	GO:0008016~regulation of heart contraction	2	2.73973	0.0831461	ENSMUSG00000024486, ENSMUSG00000044080	59	27	18082	22.7018	1	0.958887	72.4519
GOTERM_BP_DIRECT	GO:2000463~positive regulation of excitatory postsynaptic potential	2	2.73973	0.0860914	ENSMUSG00000042589, ENSMUSG00000024109	59	28	18082	21.891	1	0.956101	73.7374
GOTERM_BP_DIRECT	GO:0050775~positive regulation of dendrite morphogenesis	2	2.73973	0.0919542	ENSMUSG00000042589, ENSMUSG00000019970	59	30	18082	20.4316	1	0.958124	76.1314
GOTERM_BP_DIRECT	GO:0008284~positive regulation of cell proliferation	5	6.84932	0.0957375	ENSMUSG00000059588, ENSMUSG00000024486, ENSMUSG00000028364, ENSMUSG00000057777, ENSMUSG00000000489	59	542	18082	2.82726	1	0.956927	77.5665
